# Supplementary material for: A Family of Trigonometrically Fitted Enright Second Derivative Methods for Stiff and Oscillatory Initial Value Problems
Source: Hindawi journal article supplement (doi:10.1155/2015/343295), 2015-01-01
Supplement: f1 [file 343295.f1.pdf]

# Supplementary material for: A family of trigonometrically-fitted Enright second derivative methods for stiff and oscillatory initial value problems

F. F. NGWANE\*† and S. N. JATOR‡

Department of Mathematics,  
USC Salkehatchie, SC, U.S.A

‡Department of Mathematics and Statistics,  
Austin Peay State University  
Clarksville, TN 37044

January 23, 2015

## Appendix 1

1.A: Defining variables in equation (17)

$$\begin{aligned}
 N_{\beta 0} &= -(\csc(\frac{u}{2})^4(696 + 54u^2 + 114(-8 + u^2)\cos u - 6(-44 + 5u^2)\cos(2u) - 48\cos(3u) + 6u^2\cos(3u) - 433u\sin u + \\
 &116u\sin(2u) - 29u\sin(3u))) \\
 N_{\beta 1} &= \csc(\frac{u}{2})^4(2544 + 222u^2 + 48(-65 + 9u^2)\cos u + (576 - 84u^2)\cos(2u) + 48\cos(3u) - 48\cos(4u) + 6u^2\cos(4u) - \\
 &1716u\sin u + 370u\sin(2u) - 20u\sin(3u) - 29u\sin(4u)) \\
 N_{\beta 2} &= -(\csc(\frac{u}{2})^4(1548 + 177u^2 + 6(-258 + 47u^2)\cos u - 288\cos(2u) + 396\cos(3u) - 42u^2\cos(3u) - 108\cos(4u) + \\
 &15u^2\cos(4u) - 1232u\sin u + 104u\sin(2u) + 144u\sin(3u) - 68u\sin(4u))) \\
 N_{\beta 3} &= \csc(\frac{u}{2})^4(624 + 330u^2 + 1104\cos u + 12(-272 + 47u^2)\cos(2u) + 1968\cos(3u) - 432u^2\cos(3u) - 432\cos(4u) + \\
 &114u^2\cos(4u) - 348u\sin u - 1682u\sin(2u) + 1348u\sin(3u) - 371u\sin(4u)) \\
 N_{\beta 4} &= \csc(\frac{u}{2})^4(624 - 6(332 + 55u^2)\cos u + 6(396 + 59u^2)\cos(2u) - 1272\cos(3u) - 222u^2\cos(3u) + 264\cos(4u) + \\
 &54u^2\cos(4u) + 2143u\sin u - 1484u\sin(2u) + 371u\sin(3u)) \\
 N_{\gamma n+4} &= -3\sin(\frac{u}{2})(9u\cos(\frac{u}{2}) + 3u\cos(\frac{3u}{2}) - 8\sin(\frac{3u}{2}))
 \end{aligned}$$

1.B: Defining variables in equation (18)

$$\begin{aligned}
 N_{\hat{\beta}_{0,0}} &= (\csc(\frac{u}{2})^4(-144 - 18u^2 + 2(88 + 45u^2)\cos u - 2(44 + 27u^2)\cos(2u) + 144\cos(3u) + 126u^2\cos(3u) - 88\cos(4u) - \\
 &261u\sin u + 420u\sin(2u) - 225u\sin(3u) - 48u\sin(4u))) \\
 N_{\hat{\beta}_{1,0}} &= -(\csc(\frac{u}{2})^4(-496 + 54u^2 - 48(-11 + 3u^2)\cos u + 12(-16 + 45u^2)\cos(2u) + 496\cos(3u) - 336\cos(4u) + \\
 &126u^2\cos(4u) + 1596u\sin u - 1062u\sin(2u) + 348u\sin(3u) - 417u\sin(4u))) \\
 N_{\hat{\beta}_{2,0}} &= (3\csc(\frac{u}{2})^4(-84 - 9u^2 + (44 + 54u^2)\cos u + 32\cos(2u) + 84\cos(3u) + 90u^2\cos(3u) - 76\cos(4u) + 9u^2\cos(4u) - \\
 &48u\sin u + 216u\sin(2u) - 144u\sin(3u) - 60u\sin(4u)))
 \end{aligned}$$

$$\begin{aligned}
N_{\hat{\beta}_{3,0}} &= -(\csc(\frac{u}{2}))^4(144 + 18u^2 - 880 \cos u + 4(272 + 81u^2) \cos(2u) - 144 \cos(3u) + 144u^2 \cos(3u) - 208 \cos(4u) + \\
&90u^2 \cos(4u) + 1140u \sin u - 378u \sin(2u) - 108u \sin(3u) - 303u \sin(4u)) \\
N_{\hat{\beta}_{4,0}} &= (\csc(\frac{u}{2}))^4(296 + 18(-44 + u^2) \cos u + 18(44 + 3u^2) \cos(2u) - 296 \cos(3u) + 54u^2 \cos(3u) + 18u^2 \cos(4u) + \\
&309u \sin u - 36u \sin(2u) - 111u \sin(3u) - 48u \sin(4u)) \\
N_{\hat{\gamma}_{n+4,0}} &= -3 \sin(\frac{u}{2})(9u \cos(\frac{u}{2}) + 3u \cos(\frac{3u}{2}) - 8 \sin(\frac{3u}{2}))
\end{aligned}$$

1.C: Defining variables in equation (19)

$$\begin{aligned}
N_{\hat{\beta}_{0,1}} &= (\csc(\frac{u}{2}))^4(-48 + (33 + 6u^2) \cos u + 24(2 + u^2) \cos(2u) - 33 \cos(3u) + 6u^2 \cos(3u) + 71u \sin u - 28u \sin(2u) - \\
&29u \sin(3u)) \\
N_{\hat{\beta}_{1,1}} &= -(\csc(\frac{u}{2}))^4(-192 + 6u^2 + 132 \cos u + 12(16 + 11u^2) \cos(2u) - 132 \cos(3u) + 6u^2 \cos(4u) + 408u \sin u - \\
&242u \sin(2u) - 56u \sin(3u) - 11u \sin(4u)) \\
N_{\hat{\beta}_{2,1}} &= (\csc(\frac{u}{2}))^4(-144 - 12u^2 + 33(3 + 2u^2) \cos u + 144 \cos(2u) - 99 \cos(3u) + 66u^2 \cos(3u) - 12u^2 \cos(4u) - \\
&35u \sin u + 176u \sin(2u) - 207u \sin(3u) + 22u \sin(4u)) \\
N_{\hat{\beta}_{3,1}} &= -(\csc(\frac{u}{2}))^4(-192 + 6u^2 + 132 \cos u + 12(16 + 11u^2) \cos(2u) - 132 \cos(3u) + 6u^2 \cos(4u) + 408u \sin u - \\
&242u \sin(2u) - 56u \sin(3u) - 11u \sin(4u)) \\
N_{\hat{\beta}_{4,1}} &= (\csc(\frac{u}{2}))^4(-48 + (33 + 6u^2) \cos u + 24(2 + u^2) \cos(2u) - 33 \cos(3u) + 6u^2 \cos(3u) + 71u \sin u - 28u \sin(2u) - \\
&29u \sin(3u))
\end{aligned}$$

1.D: Defining variables in equation (20)

$$\begin{aligned}
N_{\hat{\beta}_{0,2}} &= -(\csc(\frac{u}{2}))^4(648 + 6u^2 - 6(160 + 13u^2) \cos u - 78(-4 + u^2) \cos(2u) + 6u^2 \cos(3u) - 353u \sin u + 340u \sin(2u) - \\
&13u \sin(3u)) \\
N_{\hat{\beta}_{1,2}} &= (\csc(\frac{u}{2}))^4(2112 + 30u^2 - 48(65 + 7u^2) \cos u + (960 - 276u^2) \cos(2u) + 48 \cos(3u) + 6u^2 \cos(4u) - 1140u \sin u + \\
&1106u \sin(2u) + 44u \sin(3u) - 13u \sin(4u)) \\
N_{\hat{\beta}_{2,2}} &= -(\csc(\frac{u}{2}))^4(864 + 57u^2 - 30(42 + 13u^2) \cos u + 288 \cos(2u) + 108 \cos(3u) - 138u^2 \cos(3u) + 39u^2 \cos(4u) + \\
&80u \sin u - 104u \sin(2u) + 432u \sin(3u) - 76u \sin(4u)) \\
N_{\hat{\beta}_{3,2}} &= (\csc(\frac{u}{2}))^4(-1728 - 54u^2 + 2640 \cos u - 12(112 + 65u^2) \cos(2u) + 432 \cos(3u) + 336u^2 \cos(3u) - 78u^2 \cos(4u) - \\
&1692u \sin u + 1934u \sin(2u) - 508u \sin(3u) + 125u \sin(4u)) \\
N_{\hat{\beta}_{4,2}} &= (\csc(\frac{u}{2}))^4(1992 + 6(-500 + 9u^2) \cos u + 6(212 + 19u^2) \cos(2u) - 264 \cos(3u) - 30u^2 \cos(3u) + 6u^2 \cos(4u) - \\
&337u \sin u + 212u \sin(2u) - 125u \sin(3u)) \\
N_{\hat{\gamma}_{n+4,2}} &= -\sin(\frac{u}{2})(-13u \cos(\frac{u}{2}) + u \cos(\frac{3u}{2}) + 24 \sin(\frac{u}{2}))
\end{aligned}$$

## Appendix 2: Defining the stability function ( $M(q; u)$ )

$$\text{Case } k = 1: \quad M(q; u) = \frac{1 - \frac{(\csc(u/2)^2)(-u + \sin u)q}{(2u)}}{1 + \frac{(\csc(u/2)^2)(u \cos u - \sin u)q}{(2u)} - \frac{(-2 + u \cot(u/2))(q^2)}{u^2}}$$

$$\text{Case } k = 2: \quad M(q; u) \equiv \frac{\mathcal{P}(q; u)}{\mathcal{Q}(q; u)}, \quad \text{with}$$

$$\begin{aligned}
\mathcal{P}(q; u) &= -(2q^2u + 2u^3 + 3qu^3 + 2q^2u^3 - 4u(q^2 + u^2 + qu^2) \cos u + u(2q^2 + 2u^2 + qu^2) \cos(2u) + 4q^2 \sin u + 4u^2 \sin u - \\
&4q^2u^2 \sin u - 2q^2 \sin(2u) - 2u^2 \sin(2u) + q^2u^2 \sin(2u)) \\
\mathcal{Q}(q; u) &= (-2q^2u + 2q^3u - 2u^3 + qu^3 - 4u(-q^2 + 2q^3 - u^2 + qu^2) \cos u + u(6q^3 - 2u^2 + 3qu^2 - 2q^2(1 + u^2)) \cos(2u) - \\
&4q^2 \sin u + 8q^3 \sin u - 4u^2 \sin u + 8qu^2 \sin u - 4q^2u^2 \sin u + 2q^2 \sin(2u) - 4q^3 \sin(2u) + 2u^2 \sin(2u) - 4qu^2 \sin(2u) + \\
&3q^2u^2 \sin(2u) + 2q^3u^2 \sin(2u))
\end{aligned}$$

$$\text{Case } k = 3: \quad M(q; u) \equiv \frac{\mathcal{P}(q; u)}{\mathcal{Q}(q; u)}, \quad \text{with}$$

$$\begin{aligned}
\mathcal{P}(q; u) = & -(2(6q^2u + 12q^3u + 6u^3 + 12qu^3 + 11q^2u^3 + 6q^3u^3 - 6u(5q^3 + 3u^2 + 5qu^2 + 3q^2(1 + u^2))) \cos u + 3u(8q^3 + 6u^2 + \\
& 8qu^2 + 3q^2(2 + u^2)) \cos(2u) - 6q^2u \cos(3u) - 6q^3u \cos(3u) - 6u^3 \cos(3u) - 6qu^3 \cos(3u) - 2q^2u^3 \cos(3u) + 45q^2 \sin u + \\
& 47q^3 \sin u + 45u^2 \sin u + 47qu^2 \sin u - 18q^3u^2 \sin u - 36q^2 \sin(2u) - 34q^3 \sin(2u) - 36u^2 \sin(2u) - 34qu^2 \sin(2u) + \\
& 9q^3u^2 \sin(2u) + 9q^2 \sin(3u) + 7q^3 \sin(3u) + 9u^2 \sin(3u) + 7qu^2 \sin(3u) - 2q^3u^2 \sin(3u)) \\
\mathcal{Q}(q; u) = & (-12q^2u + 12q^3u - 8q^4u - 12u^3 + 12qu^3 - 4q^2u^3 + 6u(-8q^3 + 6q^4 + 6u^2 - 8qu^2 + 3q^2(2 + u^2))) \cos u - 12u(-5q^3 + \\
& 6q^4 + 3u^2 - 5qu^2 + 3q^2(1 + u^2)) \cos[2u] + 12q^2u \cos(3u) - 24q^3u \cos(3u) + 44q^4u \cos(3u) + 12u^3 \cos(3u) - 24qu^3 \cos(3u) + \\
& 22q^2u^3 \cos(3u) - 12q^3u^3 \cos(3u) - 90q^2 \sin u + 176q^3 \sin u - 123q^4 \sin u - 90u^2 \sin u + 176qu^2 \sin u - 123q^2u^2 \sin u + \\
& 18q^3u^2 \sin u + 72q^2 \sin(2u) - 148q^3 \sin(2u) + 120q^4 \sin(2u) + 72u^2 \sin(2u) - 148qu^2 \sin(2u) + 120q^2u^2 \sin(2u) - \\
& 36q^3u^2 \sin(2u) - 18q^2 \sin(3u) + 40q^3 \sin(3u) - 39q^4 \sin(3u) - 18u^2 \sin(3u) + 40qu^2 \sin(3u) - 39q^2u^2 \sin(3u) + \\
& 22q^3u^2 \sin(3u) + 12q^4u^2 \sin(3u));
\end{aligned}$$

$$\text{Case } k = 4: \quad M(q; u) \equiv \frac{\mathcal{P}(q; u)}{\mathcal{Q}(q; u)}, \quad \text{with}$$

$$\begin{aligned}
\mathcal{P}(q; u) = & -(72q^2u + 180q^3u + 210q^4u + 72u^3 + 180qu^3 + 210q^2u^3 + 150q^3u^3 + 72q^4u^3 - 24u(26q^4 + 12u^2 + 27qu^2 + \\
& 3q^3(9 + 4u^2) + 2q^2(6 + 13u^2)) \cos u + 36u(19q^4 + 12u^2 + 24qu^2 + 6q^3(4 + u^2) + q^2(12 + 19u^2)) \cos(2u) - 288q^2u \cos(3u) - \\
& 504q^3u \cos(3u) - 336q^4u \cos(3u) - 288u^3 \cos(3u) - 504qu^3 \cos(3u) - 336q^2u^3 \cos(3u) - 96q^3u^3 \cos(3u) + 72q^2u \cos(4u) + \\
& 108q^3u \cos(4u) + 66q^4u \cos(4u) + 72u^3 \cos(4u) + 108qu^3 \cos(4u) + 66q^2u^3 \cos(4u) + 18q^3u^3 \cos(4u) + 1488q^2 \sin u + \\
& 2520q^3 \sin u + 1424q^4 \sin u + 1488u^2 \sin u + 2520qu^2 \sin u + 1424q^2u^2 \sin u - 288q^4u^2 \sin u - 1560q^2 \sin(2u) - 2520q^3 \sin(2u) - \\
& 1334q^4 \sin(2u) - 1560u^2 \sin(2u) - 2520qu^2 \sin(2u) - 1334q^2u^2 \sin(2u) + 216q^4u^2 \sin(2u) + 720q^2 \sin(3u) + 1080q^3 \sin(3u) + \\
& 528q^4 \sin(3u) + 720u^2 \sin(3u) + 1080qu^2 \sin(3u) + 528q^2u^2 \sin(3u) - 96q^4u^2 \sin(3u) - 132q^2 \sin(4u) - 180q^3 \sin(4u) - \\
& 85q^4 \sin(4u) - 132u^2 \sin(4u) - 180qu^2 \sin(4u) - 85q^2u^2 \sin(4u) + 18q^4u^2 \sin(4u)) \\
\mathcal{Q}(q; u) = & (-72q^2u + 108q^3u - 66q^4u + 36q^5u - 72u^3 + 108qu^3 - 66q^2u^3 + 18q^3u^3 - 24u(-14q^4 + 8q^5 - 12u^2 + 21qu^2 + \\
& q^3(21 + 4u^2) - 2q^2(6 + 7u^2)) \cos u + 36u(-19q^4 + 12q^5 - 12u^2 + 24qu^2 + 6q^3(4 + u^2) - q^2(12 + 19u^2)) \cos(2u) + \\
& 288q^2u \cos(3u) - 648q^3u \cos(3u) + 624q^4u \cos(3u) - 576q^5u \cos(3u) + 288u^3 \cos(3u) - 648qu^3 \cos(3u) + 624q^2u^3 \cos(3u) - \\
& 288q^3u^3 \cos(3u) - 72q^2u \cos(4u) + 180q^3u \cos(4u) - 210q^4u \cos(4u) + 300q^5u \cos(4u) - 72u^3 \cos(4u) + 180qu^3 \cos(4u) - \\
& 210q^2u^3 \cos(4u) + 150q^3u^3 \cos(4u) - 72q^4u^3 \cos(4u) - 1488q^2 \sin u + 3432q^3 \sin u - 3248q^4 \sin u + 1408q^5 \sin u - \\
& 1488u^2 \sin u + 3432qu^2 \sin u - 3248q^2u^2 \sin u + 1408q^3u^2 \sin u - 96q^4u^2 \sin u + 1560q^2 \sin(2u) - 3720q^3 \sin(2u) + \\
& 3734q^4 \sin(2u) - 1816q^5 \sin(2u) + 1560u^2 \sin(2u) - 3720qu^2 \sin(2u) + 3734q^2u^2 \sin(2u) - 1816q^3u^2 \sin(2u) + 216q^4u^2 \sin(2u) - \\
& 720q^2 \sin(3u) + 1800q^3 \sin(3u) - 1968q^4 \sin(3u) + 1152q^5 \sin(3u) - 720u^2 \sin(3u) + 1800qu^2 \sin(3u) - 1968q^2u^2 \sin(3u) + \\
& 1152q^3u^2 \sin(3u) - 288q^4u^2 \sin(3u) + 132q^2 \sin(4u) - 348q^3 \sin(4u) + 421q^4 \sin(4u) - 308q^5 \sin(4u) + 132u^2 \sin(4u) - \\
& 348qu^2 \sin(4u) + 421q^2u^2 \sin(4u) - 308q^3u^2 \sin(4u) + 150q^4u^2 \sin(4u) + 72q^5u^2 \sin(4u));
\end{aligned}$$

### Appendix 3: Defining the predictor variables in equation (26)

$$\begin{aligned}
\bar{\beta}_0 = & (\csc(\frac{u}{2})^4(18 - 23u^2 - 18 \cos u + 4(100u^2 - 6(1 + 16u^2))) \cos u + 24 \cos(2u) + (-245u^2 + 3(2 + 80u^2)) \cos(2u) - \\
& 6 \cos(3u) + 32u \sin u - 4u \sin(2u)) / (96u(u + 2u \cos u - 3 \sin u)) \\
\bar{\beta}_1 = & -\csc(\frac{u}{2})^4(3(155u^2 - 9(2 + 16u^2)) \cos u + (-245u^2 + 3(2 + 80u^2)) \cos(3u) + 2(24 - 32u^2 - 24 \cos u + 27 \cos(2u) - \\
& 3 \cos(4u) + 44u \sin u - u \sin(2u) - 2u \sin(3u))) / (96u(u + 2u \cos u - 3 \sin u)) \\
\bar{\beta}_2 = & \csc(\frac{u}{2})^4(30 - 53u^2 - 30 \cos u + 3(155u^2 - 9(2 + 16u^2)) \cos(2u) + 54 \cos(3u) - 4(100u^2 - 6(1 + 16u^2)) \cos(3u) - \\
& 24 \cos(4u) + 34u \sin u + 52u \sin(2u) - 22u \sin(3u)) / (96u(u + 2u \cos u - 3 \sin u)) \\
\bar{\beta}_3 = & -\csc(\frac{u}{2})^4((-101u^2 + 3(10 + 16u^2)) \cos u - 30 \cos(2u) - 4(-64u^2 + 3(4 + 16u^2)) \cos(2u) + 66 \cos(3u) - \\
& 23u^2 \cos(3u) - 18 \cos(4u) + 68u \sin u - 22u \sin(2u)) / (96u(u + 2u \cos u - 3 \sin u)) \\
\bar{\gamma}_{n+3} = & (\csc(\frac{u}{2})^4(-12 + 48 \cos u - 72 \cos(2u) + 48 \cos(3u) - 12 \cos(4u) - 91u \sin u + 80u \sin(2u) - 23u \sin(3u))) / (96u(u + \\
& 2u \cos u - 3 \sin u))
\end{aligned}$$
